# Supplementary material for: The Prognostic Value of DCE-MRI Findings before Salvage Radiotherapy after Radical Prostatectomy
Source: MDPI journal article supplement (doi:10.3390/cancers15041246), 2023-02-15
Supplement: s1 [file s1]

**Supplementary Table S1.** Univariable analysis on bNED survival.

| Covariate                  | Stratification  | HR    | 95%CI       | p value |
|----------------------------|-----------------|-------|-------------|---------|
| Age                        | Continuum       | 1.01  | 0.97-1.05   | 0.612   |
| pT stage                   | 2               | 1     |             |         |
|                            | 3               | 1.27  | 0.72-2.22   | 0.405   |
| SVI                        | No              | 1     |             |         |
|                            | Yes             | 2.48  | 1.11-5.5    | 0.026   |
| Surgical margins at RP     | R0              | 1     |             |         |
|                            | R1              | 1.08  | 0.62-1.89   | 0.786   |
| ISUP category              | 1-2             | 1     |             |         |
|                            | 3-5             | 1.38  | 0.79-2.42   | 0.255   |
| PSA detectable after RP    | No              | 1     |             |         |
|                            | Yes             | 1.79  | 0.81-3.99   | 0.152   |
| Time from RP to sRT (mths) | Continuum       | 1.00  | 0.99-1.00   | 0.426   |
| PSA at RP (ng/ml)          | Continuum       | 1.01  | 1.00-1.03   | 0.061   |
| Pre sRT PSA (ng/ml)        | Continuum       | 1.10  | 0.94-1.28   | 0.227   |
| PSADT (mths)               | Continuum       | 0.97  | 0.94-0.99   | 0.021   |
| Multiparametric MR         | Negative        | 1     |             |         |
|                            | Positive        | 0.605 | 0.345-1.062 | 0.080   |
| # local lesions            | None            | 1     |             |         |
|                            | 1               | 0.62  | 0.35-1.11   | 0.111   |
|                            | 2+              | 0.49  | 0.15-1.63   | 0.245   |
| Sites                      | None            | 1     |             |         |
|                            | VUA only        | 0.38  | 0.18-0.82   | 0.014   |
|                            | BN/RV±VUA       | 0.88  | 0.47-1.65   | 0.694   |
| Total Volume (cc)          | Continuum       | 1.06  | 1.01-1.10   | 0.014   |
| DCE-MRI                    | In              | 1     |             |         |
|                            | Out             | 0.74  | 0.35-1.58   | 0.439   |
| PET/CT                     | Choline only    | 1     |             |         |
|                            | Cu/PSMA±Choline | 0.82  | 0.45-1.47   | 0.500   |
| WPRT                       | No              | 1     |             |         |

|                      |      |      |           |       |
|----------------------|------|------|-----------|-------|
|                      | Yes  | 0.96 | 0.54-1.72 | 0.896 |
| EAU risk             | Low  | 1    |           |       |
|                      | High | 2.38 | 1.21-4.67 | 0.012 |
| Androgen deprivation | None | 1    |           |       |
|                      | Any  | 1.87 | 0.91-3.86 | 0.090 |

Abbreviations: bNED: biochemical no evidence of disease; HR: hazard ratio; 95%CI: 95% confidence interval; pT: pathological tumor stage; SVI: seminal vesicle invasion; RP: radical prostatectomy; ISUP: International Society of Urological Pathology; PSA: prostate specific antigen; sRT: salvage radiotherapy; mths: months; PSADT: PSA doubling time; MR: magnetic resonance; VUA: vesico-urethral anastomosis; BN: bladder neck; RV: retro-vesical space; DCE-MRI: dynamic contrast-enhanced-magnetic resonance imaging; PET/CT: positron emission tomography/computed tomography; PSMA: prostate specific membrane antigen; WPRT: whole pelvis radiotherapy; EAU: European Urology Association;
